# Supplementary material
Source: PubMed Central journal article supplement (PMC5451116)

Figure S4. Blind prediction of 3D contacts of disordered proteins with known structures captured by evolutionary couplings (30 proteins, Table S2B).

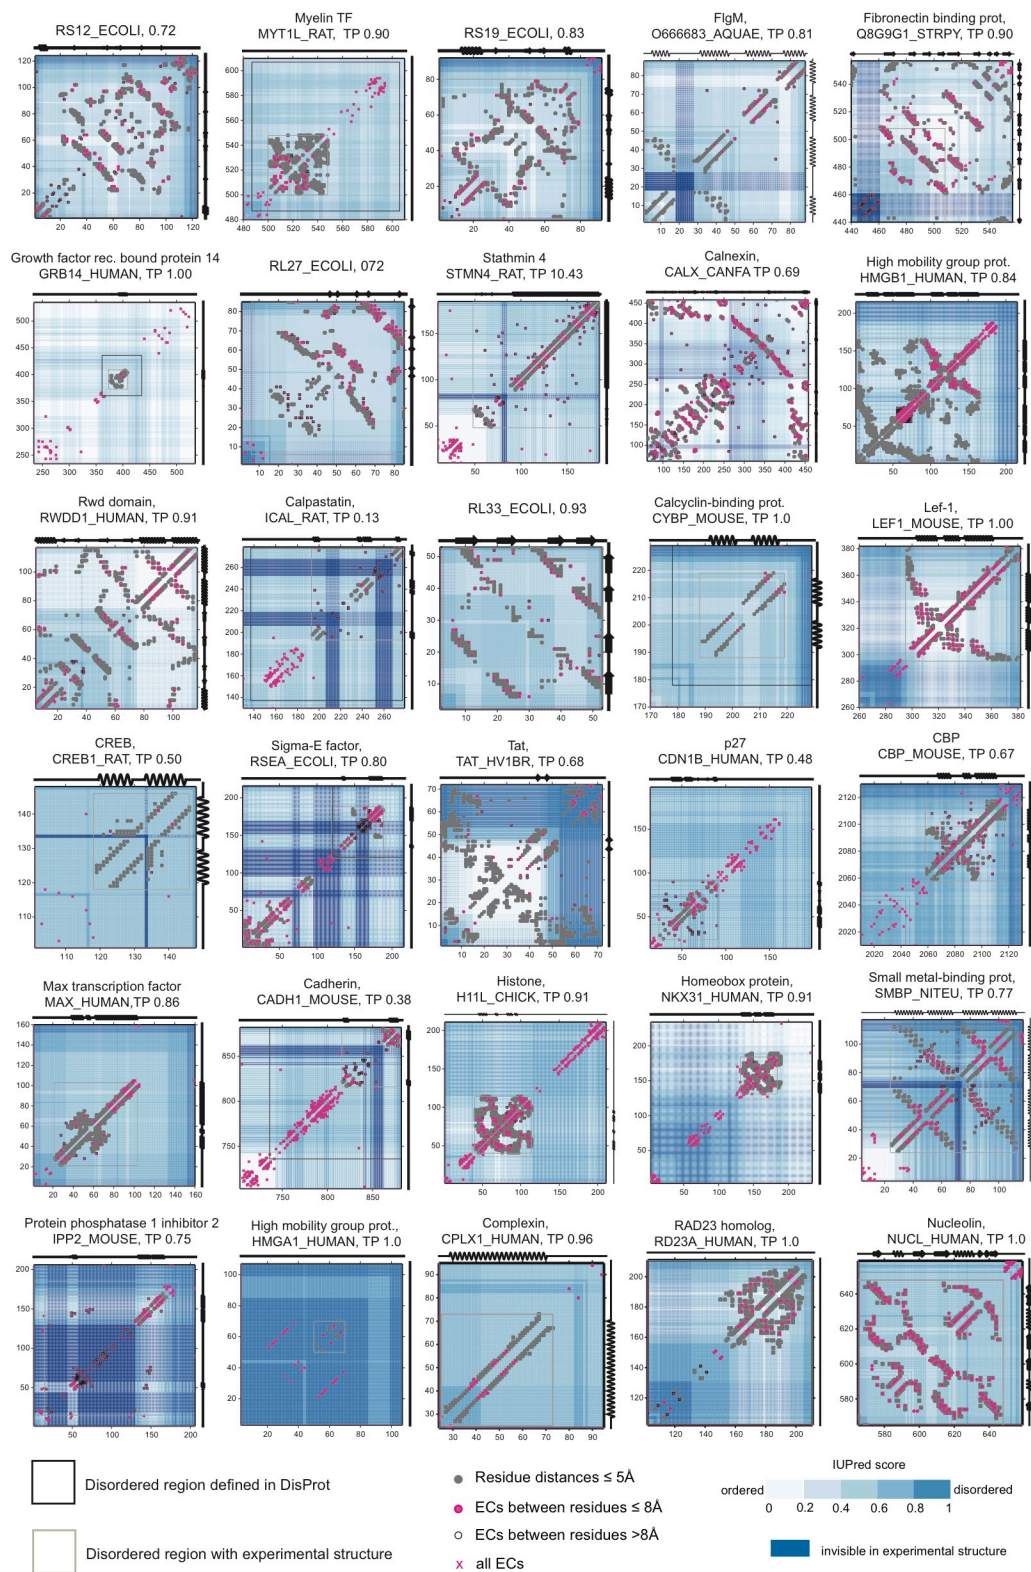

Supplement: NIHMS816623-supplement-4.pdf [file NIHMS816623-supplement-4.pdf]
