# Supplementary material
Source: PubMed Central journal article supplement (PMC5451116)

Figure S3. Prediction accuracy for proteins with alternative states (38 proteins, Table S2A)

A.

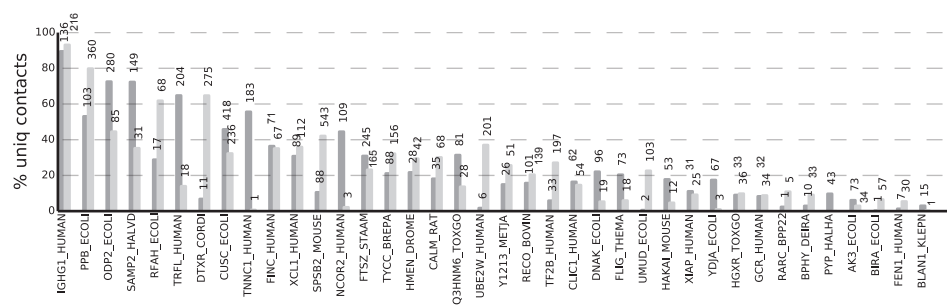

B.

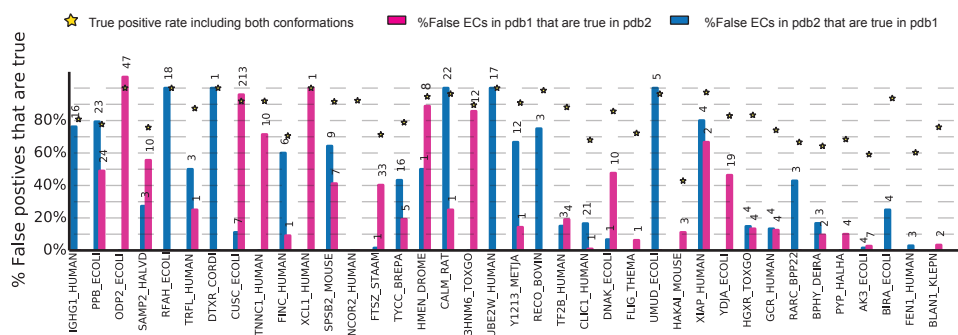

C.

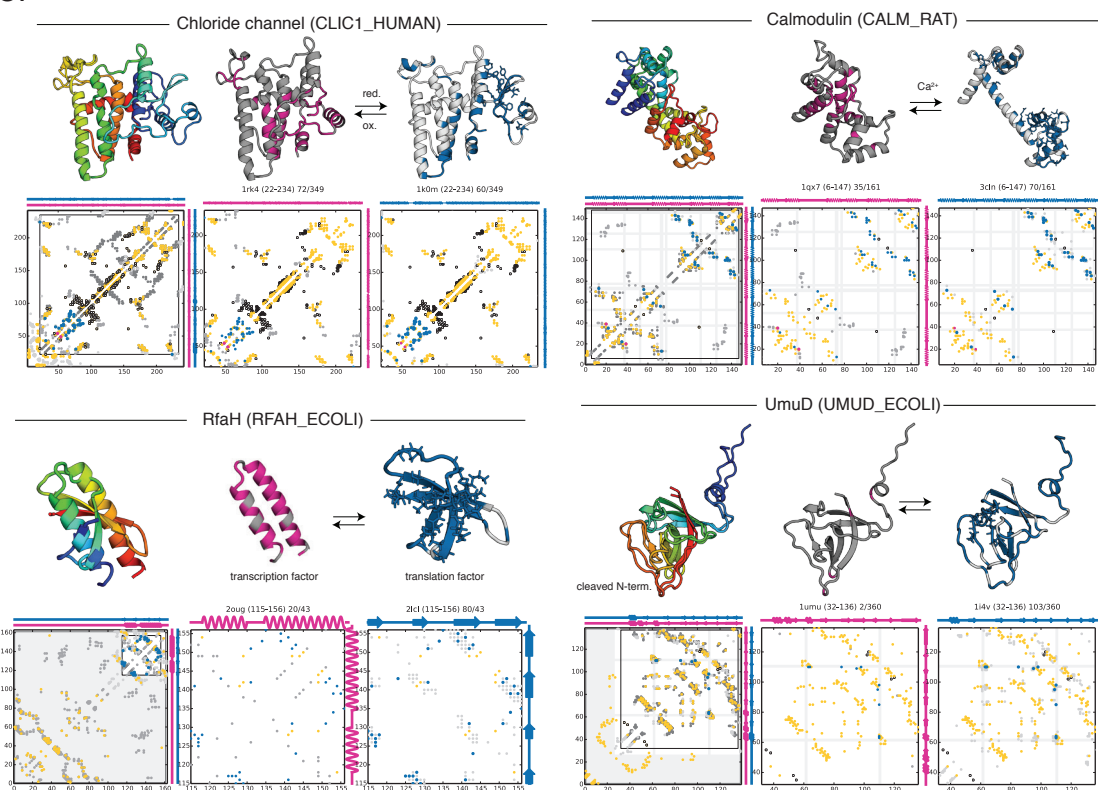

Supplement: NIHMS816623-supplement-3.pdf [file NIHMS816623-supplement-3.pdf]
